# Supplementary material for: Auger recombination dynamics in hybrid silica-coated CdTe nanocrystals
Source: Royal Society of Chemistry journal article supplement (doi:10.1039/c0cp01957g), 2011-01-01
Supplement: c0cp01957g.pdf [file c0cp01957g.pdf]

Supporting Information

# Auger Recombination Dynamics in Hybrid Silica-Coated CdTe Nanocrystals

*G. Sagarzazu<sup>a</sup>, Y. Kobayashi<sup>a</sup>, N. Murase<sup>b</sup>, P. Yang<sup>b</sup> and N. Tamai<sup>a</sup>*

<sup>a</sup> *Department of Chemistry, School of Science and Technology, Kwansai Gakuin University,  
2-1 Gakuen, Sanda, Hyogo 669-1337, Japan*

<sup>b</sup> *Health Research Institute, National Institute of Advanced Industrial Science and Technology,  
Midorigaoka, Ikeda-city, Osaka 563-8577, Japan*

## Instrumentation

The absorption and fluorescence spectra were measured using Hitachi U-4100 and FluoroMax-2 (Jobin Yvon-Spex) spectrophotometers. The PL efficiencies were obtained from a comparison with the emission of a rhodamine B reference sample. Femtosecond transient absorption pump-probe experiments were performed with an amplified mode-locked Ti:Sapphire laser (Spitfire and Tsunami, Spectra-Physics). The pump beam was chopped by a New Focus Model 3501 Chopper and the repetition rate was 0.5 kHz. The excitation intensity was measured by a calibrated power meter (Orion/PD, Ophir). The transient absorption spectra were recorded over the 420-780 nm range by 100 fs pulses of white-light continuum generated by focusing the fundamental laser into a cell containing D<sub>2</sub>O, and detected by a polychromator-CCD combination (Spectra Pro-275 and Spec-10, Acton Research Co. and Princeton Instruments).

## Pump-dependent dynamics of NC populations

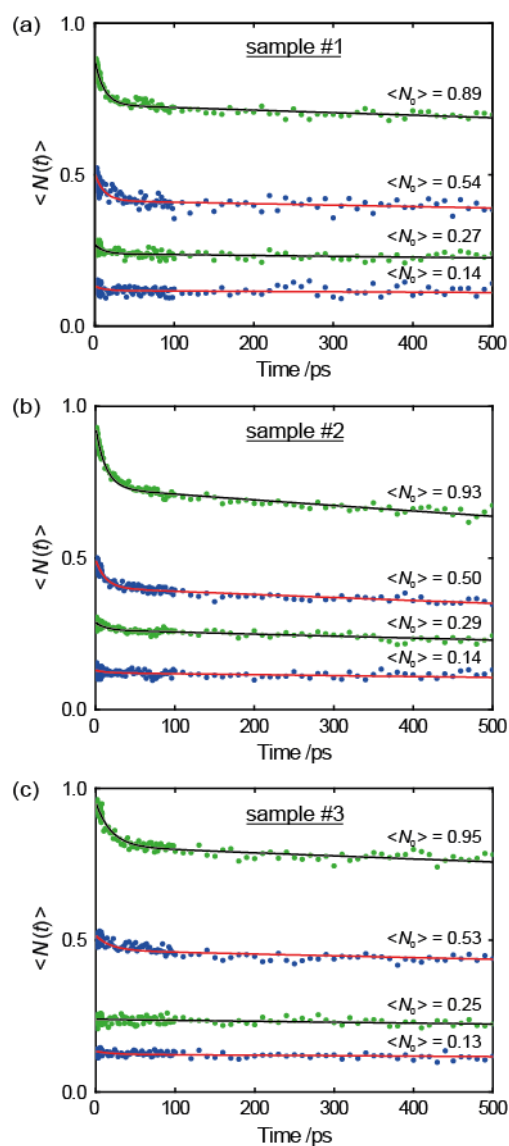

**Figure S1.** Pump-dependent dynamics of NC populations  $\langle N(t) \rangle$ . A global analysis was performed from these data, with a sum of exponential laws (solid lines). For each sample, all the datasets are simultaneously analyzed by constraining the decay times, but allowing a variation of the pre-exponential factors of the fitting law.
